# Supplementary figures and images for: BRAF inhibition in melanoma is associated with the dysregulation of histone methylation and histone methyltransferases
Source: PubMed Central journal article supplement — Neoplasia. 2020 Jul 3;22(9):376–89. doi: 10.1016/j.neo.2020.06.006 (PMC7338995; doi:10.1016/j.neo.2020.06.006), 2020-07-03

**Figure S1**

**Tet-regulated expression of BRAF<sup>VE</sup>**

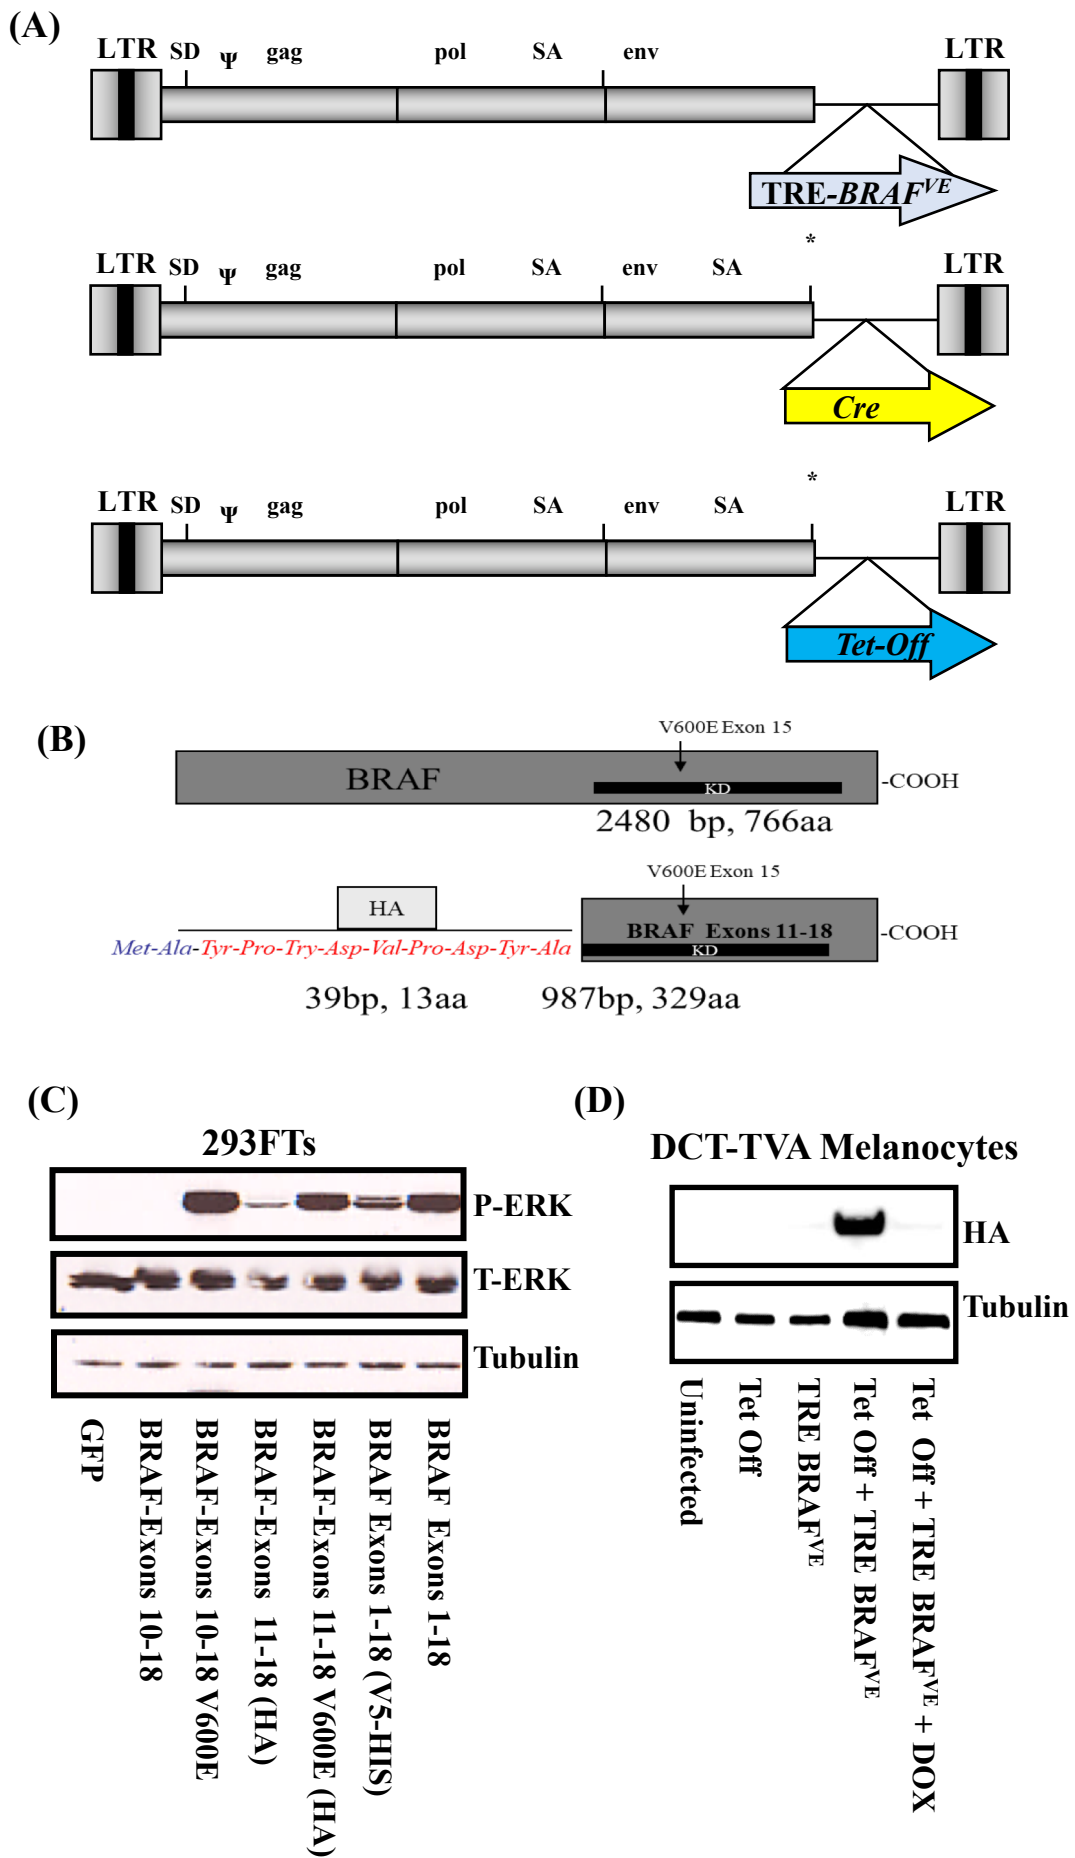

Supplement: mmc1.pdf [file mmc1.pdf]

Figure S2

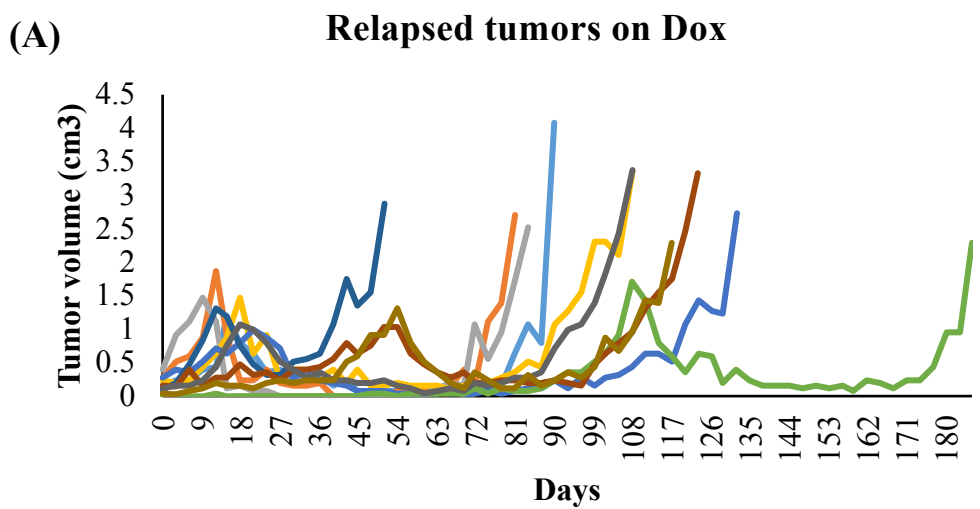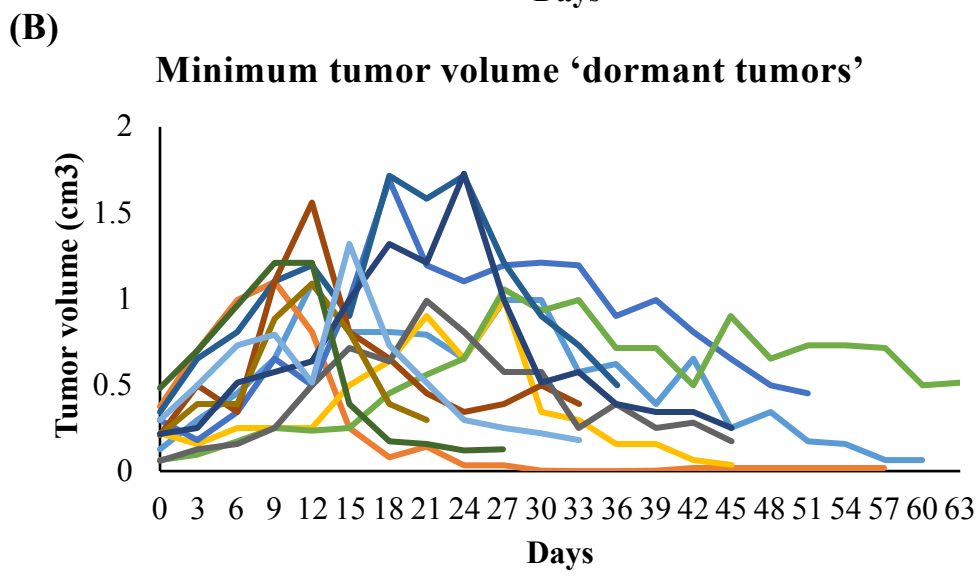

Supplement: mmc2.pdf [file mmc2.pdf]

**Figure S3**

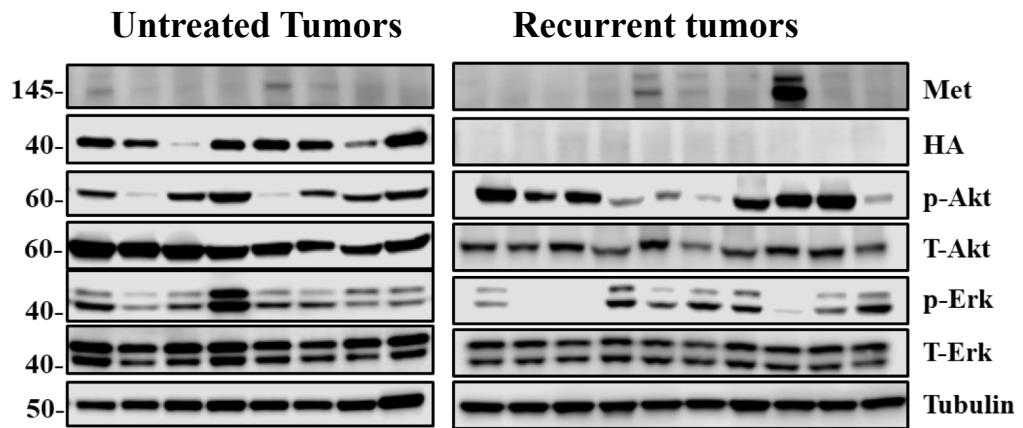

Supplement: mmc3.pdf [file mmc3.pdf]

**Figure S4**

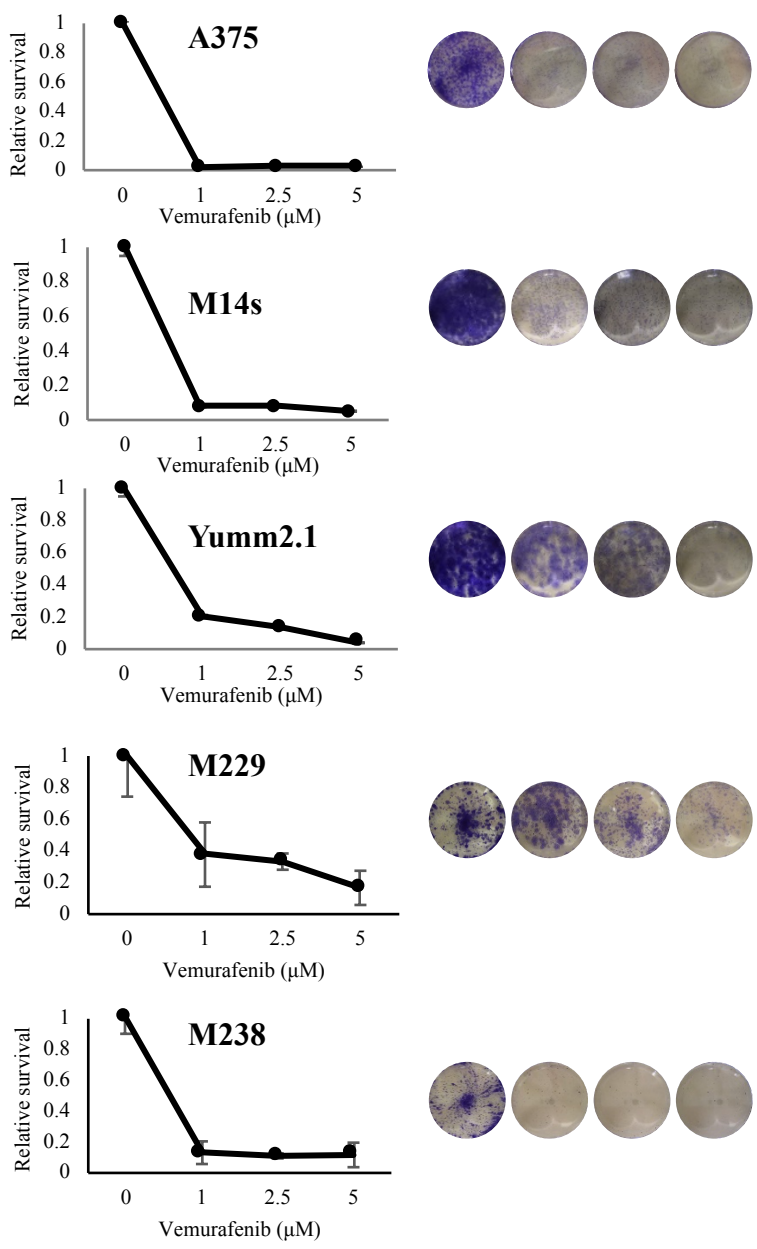

Supplement: mmc4.pdf [file mmc4.pdf]
